# Supplementary figures and images for: Genome-Wide Identification and Expression Profiling of Pathogenesis-Related Protein 1 (PR-1) Genes in Durum Wheat (Triticum durum Desf.)
Source: MDPI journal article supplement (doi:10.3390/plants12101998), 2023-05-16

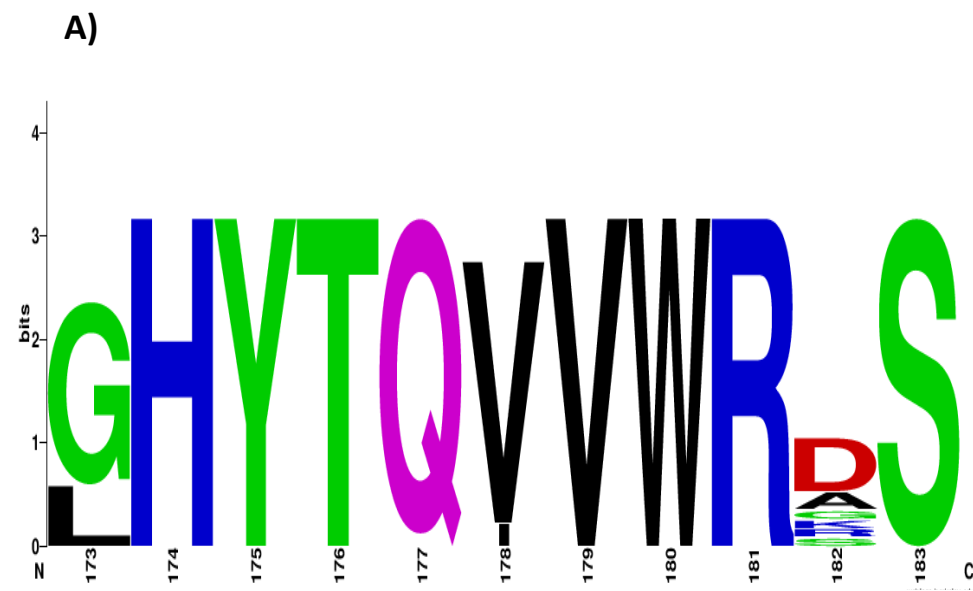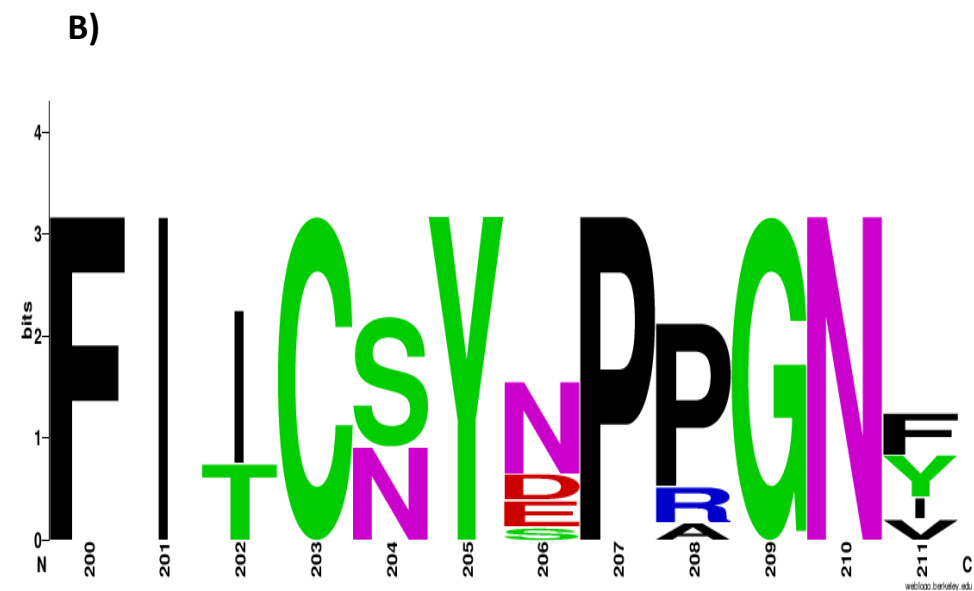

Supplement: s1 [file s1]
